# Supplementary material for: Changes in Clinical Manifestations Due to AFLD Retyping Based on the New MAFLD Criteria: An Observational Study Based on the National Inpatient Sample Database
Source: MDPI journal article supplement (doi:10.3390/diagnostics13030488), 2023-01-29
Supplement: s1 [file s1]

# Changes in Clinical Manifestations Due to AFLD Retyping Based on the New MAFLD Criteria: An Observational Study Based on the National Inpatient Sample Database

Xiaoshan Feng <sup>1,2,3,4,5,†</sup>, Ruirui Xuan <sup>1,2,3,4,5,†</sup>, Yingchun Dong <sup>1,2,3,4,5</sup>, Xiaoqin Wu <sup>6</sup>, Yiping Cheng <sup>1,2,3,4,5</sup>,  
Zinuo Yuan <sup>1,2,3,4,5</sup>, Hang Dong <sup>1,2,3,4,5</sup>, Junming Han <sup>1,2,3,4,5</sup>, Fang Zhong <sup>1,2,3,4,5</sup>, Jiajun Zhao <sup>1,2,3,4,5,\*</sup> and Xiude Fan <sup>1,2,3,4,5,\*</sup>

- <sup>1</sup> Department of Endocrinology, Shandong Provincial Hospital, Shandong University, Jinan 250021, China
- <sup>2</sup> Shandong Clinical Research Center of Diabetes and Metabolic Diseases, Jinan 250021, China
- <sup>3</sup> Shandong Institute of Endocrine and Metabolic Diseases, Jinan 250021, China
- <sup>4</sup> Shandong Engineering Laboratory of Prevention and Control for Endocrine and Metabolic Diseases, Jinan 250021, China
- <sup>5</sup> Shandong Engineering Research Center of Stem Cell and Gene Therapy for Endocrine and Metabolic Diseases, Jinan 250021, China
- <sup>6</sup> Northern Ohio Alcohol Center, Department of Inflammation and Immunity, Cleveland Clinic, Cleveland 44196, OH, USA
- \* Correspondence: jjzhao@sdu.edu.cn (J.Z.); Tel.: +86-0531-68776049(J.Z.); fanxiudexjtu@163.com (X.F.); Tel.: +86-13186067538 (X.F.)
- † These authors contributed equally to this work.

Supplementary Table S1. Diagnostic Codes Used for Including and Excluding Patients

| Diagnoses                     | ICD-10 Codes                                                                                                                                                                                                                                                                                                                                                                                                                             |
|-------------------------------|------------------------------------------------------------------------------------------------------------------------------------------------------------------------------------------------------------------------------------------------------------------------------------------------------------------------------------------------------------------------------------------------------------------------------------------|
| Alcoholic fatty liver disease | K700                                                                                                                                                                                                                                                                                                                                                                                                                                     |
| Hepatic cirrhosis             | K7031, K7031, K717, K7460, K7469, P7881                                                                                                                                                                                                                                                                                                                                                                                                  |
| Hepatic carcinoma             | C220, C221, C227                                                                                                                                                                                                                                                                                                                                                                                                                         |
| Virus hepatitis               | A5145, B0081, B150, B159, B160, B161, B162, B169, B170, B1710, B1711, B172, B178, B179, B180, B181, B182, B188, B189, B190, B1910, B1911, B1920, B1921, B199, B251, B2681, B581, B942                                                                                                                                                                                                                                                    |
| Toxic hepatitis               | K712, K713, K714, K7150, K7151, K716                                                                                                                                                                                                                                                                                                                                                                                                     |
| Autoimmune hepatitis          | K754                                                                                                                                                                                                                                                                                                                                                                                                                                     |
| Wilson's disease              | E8301                                                                                                                                                                                                                                                                                                                                                                                                                                    |
| Liver cancer                  | C220, C221, C222, C223, C224, C227, C228, C229                                                                                                                                                                                                                                                                                                                                                                                           |
| Pregnancy                     | Z331,Z332,Z333,Z3400,Z3401,Z3402,Z3403,Z3480,Z3481,Z3482,Z3483,Z3491,Z3492,Z3493,Z36,Z360,Z361,Z362,Z363,Z364,Z365,Z3681,Z3682,Z3683,Z3684,Z3685,Z3686,Z3687,Z3688,Z3689,Z368A,Z369,Z3A00,Z3A01,Z3A08,Z3A09,Z3A10,Z3A11,Z3A12,Z3A13,Z3A14,Z3A15,Z3A16,Z3A17,Z3A19,Z3A18,Z3A20,Z3A21,Z3A22,Z3A23,Z3A24,Z3A25,Z3A26,Z3A27,Z3A28,Z3A29,Z3A30,Z3A31,Z3A32,Z3A33,Z3A34,Z3A35,Z3A36,Z3A37,Z3A38,Z3A39,Z3A40,Z3A41,Z3A42,Z3A49,O000,O0000,O0001 |

ICD, International Classification of Disease.

**Supplementary Table S2 Diagnostic Codes Used for Identifying Comorbidities**

| <b>Diagnoses</b>                   | <b>ICD-10 Codes</b>                                                                                                                                                                                                                                                                                                                                                                                                                                                                                                                                                                                                                                                                                                                                                                                                                                                                                                                                                                                                                                                                                                                                                                                                                                                                                                                                                                                                                                                                                                                                                                                                                                                                                                                                                                                                                                                                                                                                                                                                                                                                                                                                                                                                                                                                                                                                                                                                                    |
|------------------------------------|----------------------------------------------------------------------------------------------------------------------------------------------------------------------------------------------------------------------------------------------------------------------------------------------------------------------------------------------------------------------------------------------------------------------------------------------------------------------------------------------------------------------------------------------------------------------------------------------------------------------------------------------------------------------------------------------------------------------------------------------------------------------------------------------------------------------------------------------------------------------------------------------------------------------------------------------------------------------------------------------------------------------------------------------------------------------------------------------------------------------------------------------------------------------------------------------------------------------------------------------------------------------------------------------------------------------------------------------------------------------------------------------------------------------------------------------------------------------------------------------------------------------------------------------------------------------------------------------------------------------------------------------------------------------------------------------------------------------------------------------------------------------------------------------------------------------------------------------------------------------------------------------------------------------------------------------------------------------------------------------------------------------------------------------------------------------------------------------------------------------------------------------------------------------------------------------------------------------------------------------------------------------------------------------------------------------------------------------------------------------------------------------------------------------------------------|
| <b>Myocardial infarction</b>       | I2101, I2102, I2109, I2111, I2119, I2121, I2129, I213, I214, I219, I21A1, I21A9, I220, I221, I222, I228, I229, I252                                                                                                                                                                                                                                                                                                                                                                                                                                                                                                                                                                                                                                                                                                                                                                                                                                                                                                                                                                                                                                                                                                                                                                                                                                                                                                                                                                                                                                                                                                                                                                                                                                                                                                                                                                                                                                                                                                                                                                                                                                                                                                                                                                                                                                                                                                                    |
| <b>Coronary atherosclerosis</b>    | I2583, I2584                                                                                                                                                                                                                                                                                                                                                                                                                                                                                                                                                                                                                                                                                                                                                                                                                                                                                                                                                                                                                                                                                                                                                                                                                                                                                                                                                                                                                                                                                                                                                                                                                                                                                                                                                                                                                                                                                                                                                                                                                                                                                                                                                                                                                                                                                                                                                                                                                           |
| <b>Peripheral vascular disease</b> | I700, I701, I70201, I70202, I70203, I70208, I70209, I70211, I70212, I70213, I70218, I70219, I70221, I70222, I70223, I70228, I70229, I70231, I70232, I70233, I70234, I70235, I70238, I70239, I70241, I70242, I70243, I70244, I70245, I70248, I70249, I7025, I70261, I70262, I70263, I70268, I70269, I70291, I70292, I70293, I70298, I70299, I70301, I70302, I70303, I70308, I70309, I70311, I70312, I70313, I70318, I70319, I70321, I70322, I70323, I70328, I70329, I70331, I70332, I70333, I70334, I70335, I70338, I70339, I70341, I70342, I70343, I70344, I70345, I70348, I70349, I7035, I70361, I70362, I70363, I70368, I70369, I70391, I70392, I70393, I70398, I70399, I70401, I70402, I70403, I70408, I70409, I70411, I70412, I70413, I70418, I70419, I70421, I70422, I70423, I70428, I70429, I70431, I70432, I70433, I70434, I70435, I70438, I70439, I70441, I70442, I70443, I70444, I70445, I70448, I70449, I7045, I70461, I70462, I70463, I70468, I70469, I70491, I70492, I70493, I70498, I70499, I70501, I70502, I70503, I70508, I70509, I70511, I70512, I70513, I70518, I70519, I70521, I70522, I70523, I70528, I70529, I70531, I70532, I70533, I70534, I70535, I70538, I70539, I70541, I70542, I70543, I70544, I70545, I70548, I70549, I7055, I70561, I70562, I70563, I70568, I70569, I70591, I70592, I70593, I70598, I70599, I70601, I70602, I70603, I70608, I70609, I70611, I70612, I70613, I70618, I70619, I70621, I70622, I70623, I70628, I70629, I70631, I70632, I70633, I70634, I70635, I70638, I70639, I70641, I70642, I70643, I70644, I70645, I70648, I70649, I7065, I70661, I70662, I70663, I70668, I70669, I70691, I70692, I70693, I70698, I70699, I70701, I70702, I70703, I70708, I70709, I70711, I70712, I70713, I70718, I70719, I70721, I70722, I70723, I70728, I70729, I70731, I70732, I70733, I70734, I70735, I70738, I70739, I70741, I70742, I70743, I70744, I70745, I70748, I70749, I7075, I70761, I70762, I70763, I70768, I70769, I70791, I70792, I70793, I70798, I70799, I708, I7090, I7091, I7092, I7100, I7101, I7102, I7103, I711, I712, I713, I714, I715, I716, I718, I719, I720, I721, I722, I723, I724, I725, I726, I728, I729, I7300, I7301, I731, I7381, I7389, I739, I7401, I7409, I7410, I7411, I7419, I742, I743, I744, I745, I748, I749, I770, I771, I772, I773, I774, I775, I776, I7770, I7771, I7772, I7773, I7774, I7775, I7776, I7777, I7779, I77810, I77811, I77812, I77819, I7789, I779 |

---

**Cerebrovascular disease**

I6000, I6001, I6002, I6010, I6011, I6012, I602, I6020, I6021, I6022, I6030, I6031, I6032, I604, I6050, I6051, I6052, I606, I607, I608, I609, I610, I611, I612, I613, I614, I615, I616, I618, I619, I6200, I6201, I6202, I6203, I621, I629, I6300, I63011, I63012, I63013, I63019, I6302, I63031, I63032, I63033, I63039, I6309, I6310, I63111, I63112, I63113, I63119, I6312, I63131, I63132, I63133, I63139, I6319, I6320, I63211, I63212, I63213, I63219, I6322, I63231, I63232, I63233, I63239, I6329, I6330, I63311, I63312, I63313, I63319, I63321, I63322, I63323, I63329, I63331, I63332, I63333, I63339, I63341, I63342, I63343, I63349, I6339, I6340, I63411, I63412, I63413, I63419, I63421, I63422, I63423, I63429, I63431, I63432, I63433, I63439, I63441, I63442, I63443, I63449, I6349, I6350, I63511, I63512, I63513, I63519, I63521, I63522, I63523, I63529, I63531, I63532, I63533, I63539, I63541, I63542, I63543, I63549, I6359, I636, I638, I6381, I6389, I639, I6501, I6502, I6503, I6509, I651, I6521, I6522, I6523, I6529, I658, I659, I6601, I6602, I6603, I6609, I6611, I6612, I6613, I6619, I6621, I6622, I6623, I6629, I663, I668, I669, I670, I671, I672, I673, I674, I675, I676, I677, I6781, I6782, I6783, I67841, I67848, I67850, I67858, I6789, I679, I680, I682, I688, I6900, I6901, I69010, I69011, I69012, I69013, I69014, I69015, I69018, I69019, I69020, I69021, I69022, I69023, I69028, I69031, I69032, I69033, I69034, I69039, I69041, I69042, I69043, I69044, I69049, I69051, I69052, I69053, I69054, I69059, I69061, I69062, I69063, I69064, I69065, I69069, I69090, I69091, I69092, I69093, I69098, I6910, I6911, I69110, I69111, I69112, I69113, I69114, I69115, I69118, I69119, I69120, I69121, I69122, I69123, I69128, I69131, I69132, I69133, I69134, I69139, I69141, I69142, I69143, I69144, I69149, I69151, I69152, I69153, I69154, I69159, I69161, I69162, I69163, I69164,

|                                              |                                                                                                                                                                                                                                                                                                                                                                                                                                                                                                                                                                                                                                                                                                                                                                                                                                                                                                                                                                                                                                                                                                                                                                                                                                                                                                                                                                                                                                                                                                                |
|----------------------------------------------|----------------------------------------------------------------------------------------------------------------------------------------------------------------------------------------------------------------------------------------------------------------------------------------------------------------------------------------------------------------------------------------------------------------------------------------------------------------------------------------------------------------------------------------------------------------------------------------------------------------------------------------------------------------------------------------------------------------------------------------------------------------------------------------------------------------------------------------------------------------------------------------------------------------------------------------------------------------------------------------------------------------------------------------------------------------------------------------------------------------------------------------------------------------------------------------------------------------------------------------------------------------------------------------------------------------------------------------------------------------------------------------------------------------------------------------------------------------------------------------------------------------|
|                                              | I69165, I69169, I69190, I69191, I69192, I69193, I69198, I6920, I6921, I69210, I69211, I69212, I69213, I69214, I69215, I69218, I69219, I69220, I69221, I69222, I69223, I69228, I69231, I69232, I69233, I69234, I69239, I69241, I69242, I69243, I69244, I69249, I69251, I69252, I69253, I69254, I69259, I69261, I69262, I69263, I69264, I69265, I69269, I69290, I69291, I69292, I69293, I69298, I6930, I6931, I69310, I69311, I69312, I69313, I69314, I69315, I69318, I69319, I69320, I69321, I69322, I69323, I69328, I69331, I69332, I69333, I69334, I69339, I69341, I69342, I69343, I69344, I69349, I69351, I69352, I69353, I69354, I69359, I69361, I69362, I69363, I69364, I69365, I69369, I69390, I69391, I69392, I69393, I69398, I6980, I6981, I69810, I69811, I69812, I69813, I69814, I69815, I69818, I69819, I69820, I69821, I69822, I69823, I69828, I69831, I69832, I69833, I69834, I69839, I69841, I69842, I69843, I69844, I69849, I69851, I69852, I69853, I69854, I69859, I69861, I69862, I69863, I69864, I69865, I69869, I69890, I69891, I69892, I69893, I69898, I6990, I6991, I69910, I69911, I69912, I69913, I69914, I69915, I69918, I69919, I69920, I69921, I69922, I69923, I69928, I69931, I69932, I69933, I69934, I69939, I69941, I69942, I69943, I69944, I69949, I69951, I69952, I69953, I69954, I69959, I69961, I69962, I69963, I69964, I69965, I69969, I69990, I69991, I69992, I69993, I69998, G450, G451, G452, G453, G454, G458, G459, G460, G461, G462, G463, G464, G465, G466, G467, G468 |
| <b>Arrhythmia</b>                            | I470, I471, I472, I479, I480, I481, I4811, I4819, I482, I4820, I4821, I483, I484, I4891, I4892, I491, I492, I493, I4940, I4949, I495, I498, I499                                                                                                                                                                                                                                                                                                                                                                                                                                                                                                                                                                                                                                                                                                                                                                                                                                                                                                                                                                                                                                                                                                                                                                                                                                                                                                                                                               |
| <b>Chronic obstructive pulmonary disease</b> | J40, J410, J411, J418, J42, J430, J431, J432, J438, J439, J440, J441, J449, J4520, J4521, J4522, J4530, J4531, J4532, J4540, J4541, J4542, J4550, J4551, J4552, J45901, J45902, J45909, J45990, J45991, J45998, J470, J471, J479                                                                                                                                                                                                                                                                                                                                                                                                                                                                                                                                                                                                                                                                                                                                                                                                                                                                                                                                                                                                                                                                                                                                                                                                                                                                               |
| <b>Asthma</b>                                | J4520, J4521, J4522, J4530, J4531, J4532, J4540, J4541, J4542, J4550, J4551, J4552, J45901, J45902, J45909, J45990, J45991, J45998                                                                                                                                                                                                                                                                                                                                                                                                                                                                                                                                                                                                                                                                                                                                                                                                                                                                                                                                                                                                                                                                                                                                                                                                                                                                                                                                                                             |
| <b>Chronic respiratory failure</b>           | J9610, J9611, J9612                                                                                                                                                                                                                                                                                                                                                                                                                                                                                                                                                                                                                                                                                                                                                                                                                                                                                                                                                                                                                                                                                                                                                                                                                                                                                                                                                                                                                                                                                            |
| <b>Acute respiratory failure</b>             | J80, J95821, J95822, J9600, J9601, J9602                                                                                                                                                                                                                                                                                                                                                                                                                                                                                                                                                                                                                                                                                                                                                                                                                                                                                                                                                                                                                                                                                                                                                                                                                                                                                                                                                                                                                                                                       |
| <b>Acute hepatic failure</b>                 | K7040, K7041, K7200, K7201                                                                                                                                                                                                                                                                                                                                                                                                                                                                                                                                                                                                                                                                                                                                                                                                                                                                                                                                                                                                                                                                                                                                                                                                                                                                                                                                                                                                                                                                                     |
| <b>Chronic hepatic failure</b>               | K7210, K7211                                                                                                                                                                                                                                                                                                                                                                                                                                                                                                                                                                                                                                                                                                                                                                                                                                                                                                                                                                                                                                                                                                                                                                                                                                                                                                                                                                                                                                                                                                   |
| <b>Chronic kidney disease</b>                | N181, N182, N183, N1830, N1831, N1832, N184, N185, N186, N189, R880                                                                                                                                                                                                                                                                                                                                                                                                                                                                                                                                                                                                                                                                                                                                                                                                                                                                                                                                                                                                                                                                                                                                                                                                                                                                                                                                                                                                                                            |
| <b>Chronic kidney failure</b>                | N1830, N1831, N1832, N184, N185, N186                                                                                                                                                                                                                                                                                                                                                                                                                                                                                                                                                                                                                                                                                                                                                                                                                                                                                                                                                                                                                                                                                                                                                                                                                                                                                                                                                                                                                                                                          |

|                             |                                                                                                                                                                                                                                                                                                                                                                                                                                                                                                                                                                                                                                                                                                                                                                                                                                                                         |
|-----------------------------|-------------------------------------------------------------------------------------------------------------------------------------------------------------------------------------------------------------------------------------------------------------------------------------------------------------------------------------------------------------------------------------------------------------------------------------------------------------------------------------------------------------------------------------------------------------------------------------------------------------------------------------------------------------------------------------------------------------------------------------------------------------------------------------------------------------------------------------------------------------------------|
| <b>Acute kidney failure</b> | N170, N171, N172, N178, N179, N19                                                                                                                                                                                                                                                                                                                                                                                                                                                                                                                                                                                                                                                                                                                                                                                                                                       |
| <b>Overweight</b>           | Z6825, Z6826, Z6827, Z6828, Z6829, E663, DE660A, E669O                                                                                                                                                                                                                                                                                                                                                                                                                                                                                                                                                                                                                                                                                                                                                                                                                  |
| <b>Obesity (grade 1-3)</b>  | Z6830, Z6831, Z6832, Z6833, Z6834, DE660B, Z6835, Z6836, Z6837, Z6838, Z6839, DE660C, Z6841, Z6842, Z6843, Z6844, Z6845, E6601, E662, DE660E, DE660F, DE660G, DE660H                                                                                                                                                                                                                                                                                                                                                                                                                                                                                                                                                                                                                                                                                                    |
| <b>Hyperlipidemia</b>       | <b>Hypercholesteremia</b><br>E780, E7800, E7801<br><b>Hypertriglyceridemia</b><br>E781<br><b>Hyperlipemia</b><br>E782, E784, E7849, E785, E783, E7841                                                                                                                                                                                                                                                                                                                                                                                                                                                                                                                                                                                                                                                                                                                   |
| <b>Hypertension</b>         | H35031, H35032, H35033, H35039, G932, I10, I110, I119, I120, I129, I130, I1310, I1311, I132, I150, I151, I152, I158, I159, I160, I161, I169, I674, R030, I973                                                                                                                                                                                                                                                                                                                                                                                                                                                                                                                                                                                                                                                                                                           |
| <b>Hyperglycemia</b>        | <b>Prediabetes</b><br>R7301, R7302, R7303<br><b>T1DM</b><br>E108, E109, E1010, E1011, E1021, E1022, E1029, E10311, E10319, E10321, E103213, E103212, E103211, E103219, E10329, E103293, E103292, E103291, E103299, E10331, E103313, E103312, E103311, E103319, E10339, E103393, E103392, E103391, E103399, E10341, E103413, E103412, E103411, E103419, E10349, E103493, E103492, E103491, E103499, E10351, E103513, E103512, E103511, E103519, E103523, E103522, E103521, E103529, E103533, E103532, E103531, E103539, E103543, E103542, E103541, E103549, E103553, E103552, E103551, E103559, E10359, E103593, E103592, E103591, E103599, E1036, E1039, E1037X3, E1037X2, E1037X1, E1037X9, E1040, E1041, E1042, E1044, E1043, E1049, E1051, E1052, E1059, E10610, E10618, E10620, E10621, E10622, E10628, E10630, E10638, E10641, E10649, E1065, E1069<br><b>T2DM</b> |

---

E1100, E1101, E1111, E1110, E1122, E1121, E1129, E11311, E11319, E11321, E113213, E113212, E113211, E113219, E11329, E113293, E113292, E113291, E113299, E11331, E113313, E113312, E113311, E113319, E11339, E113393, E113392, E113391, E113399, E11341, E113413, E113412, E113411, E113419, E11349, E113493, E113492, E113491, E113499, E11351, E113513, E113512, E113511, E113519, E113523, E113522, E113521, E113529, E113533, E113532, E113531, E113539, E113543, E113542, E113541, E113549, E113553, E113552, E113551, E113559, E11359, E113593, E113592, E113591, E113599, E1136, E1139, E1144, E1143, E1141, E1140, E1142, E1149, E1152, E1151, E1159, E11620, E11621, E11622, E11628, E11610, E11618, E11630, E11638, E1137X3, E1137X2, E1137X1, E1137X9, E11641, E11649, E1165, E1169, E118, E119

---

ICD, International Classification of Diseases; T1DM, Type 1 diabetes mellitus; T2DM, Type 2 diabetes mellitus.

**Supplementary Table S3. Differences in the risk of comorbidities between AFLD&MAFLD and single AFLD.**

| Variables                   | Univariable model |                | Multivariable model |                |
|-----------------------------|-------------------|----------------|---------------------|----------------|
|                             | OR (95% CI)       | <i>P-value</i> | OR (95% CI)         | <i>P-value</i> |
| Myocardial infarction       |                   |                |                     |                |
| AFLD                        | 1 (Reference)     |                | 1 (Reference)       |                |
| AFLD&MAFLD                  | 2.10 (1.50-2.95)  | <0.001         | 1.51 (1.06-2.16)    | 0.022          |
| Coronary atherosclerosis    |                   |                |                     |                |
| AFLD                        | 1 (Reference)     |                | 1 (Reference)       |                |
| AFLD&MAFLD                  | 2.64 (2.27-3.06)  | <0.001         | 1.99(1.70-2.35)     | <0.001         |
| Cerebrovascular disease     |                   |                |                     |                |
| AFLD                        | 1 (Reference)     |                | 1 (Reference)       |                |
| AFLD&MAFLD                  | 1.55(1.03-2.35)   | 0.034          | 1.22(0.80-1.86)     | 0.365          |
| Arrhythmia                  |                   |                |                     |                |
| AFLD                        | 1 (Reference)     |                | 1 (Reference)       |                |
| AFLD&MAFLD                  | 1.37(1.20-1.56)   | <0.001         | 1.33(1.16-1.52)     | <0.001         |
| Asthma                      |                   |                |                     |                |
| AFLD                        | 1 (Reference)     |                | 1 (Reference)       |                |
| AFLD&MAFLD                  | 1.40(1.17-1.68)   | <0.001         | 1.40(1.17-1.68)     | <0.001         |
| COPD                        |                   |                |                     |                |
| AFLD                        | 1 (Reference)     |                | 1 (Reference)       |                |
| AFLD&MAFLD                  | 1.49 (1.32-1.68)  | <0.001         | 1.19 (1.02-1.38)    | 0.023          |
| CKD                         |                   |                |                     |                |
| AFLD                        | 1 (Reference)     |                | 1 (Reference)       |                |
| AFLD&MAFLD                  | 1.61(1.31-1.97)   | <0.001         | 1.36(1.06-1.74)     | 0.014          |
| Peripheral vascular disease |                   |                |                     |                |
| AFLD                        | 1 (Reference)     |                | 1 (Reference)       |                |
| AFLD&MAFLD                  | 1.82(1.23-2.71)   | 0.002          | 1.26(0.83-1.89)     | 0.209          |

Adjusted for age, sex, race, smoking habit, and other comorbidities correspondingly.

Abbreviation: AFLD, alcoholic fatty liver disease; AFLD&MAFLD, alcoholic fatty liver disease and metabolic-associated fatty liver disease (dual-etiology fatty liver disease); COPD, chronic obstructive pulmonary disease; CKD, chronic kidney disease; OR, odds ratio.

**Supplementary Table S4. Differences in the risk of organ failures between AFLD&MAFLD and single AFLD.**

| Variables                   | Univariable model |                | Multivariable model |                |
|-----------------------------|-------------------|----------------|---------------------|----------------|
|                             | OR (95% CI)       | <i>P-value</i> | AORs (95% CI)       | <i>P-value</i> |
| Acute heart failure         |                   |                |                     |                |
| AFLD                        | 1 (Reference)     |                | 1 (Reference)       |                |
| AFLD&MAFLD                  | 1.89 (1.49-2.40)  | <0.001         | 1.62(1.03-2.53)     | 0.036          |
| Chronic heart failure       |                   |                |                     |                |
| AFLD                        | 1 (Reference)     |                | 1 (Reference)       |                |
| AFLD&MAFLD                  | 1.50(1.15-1.95)   | 0.002          | 1.62(1.21-2.18)     | 0.001          |
| Acute respiratory failure   |                   |                |                     |                |
| AFLD                        | 1 (Reference)     |                | 1 (Reference)       |                |
| AFLD&MAFLD                  | 1.19 (1.01-1.40)  | 0.004          | 1.09 (0.91-1.31)    | 0.361          |
| Chronic respiratory failure |                   |                |                     |                |
| AFLD                        | 1 (Reference)     |                | 1 (Reference)       |                |
| AFLD&MAFLD                  | 2.18 (1.17-4.05)  | 0.012          | 1.88(0.94-3.73)     | 0.074          |
| Acute kidney failure        |                   |                |                     |                |
| AFLD                        | 1 (Reference)     |                | 1 (Reference)       |                |
| AFLD&MAFLD                  | 1.55 (1.38-1.74)  | <0.001         | 1.22 (1.07-1.39)    | <0.001         |
| Chronic kidney failure      |                   |                |                     |                |
| AFLD                        | 1 (Reference)     |                | 1 (Reference)       |                |
| AFLD&MAFLD                  | 1.98(1.34-2.91)   | <0.001         | 1.65(1.09-2.51)     | 0.018          |
| Acute hepatic failure       |                   |                |                     |                |
| AFLD                        | 1 (Reference)     |                | 1 (Reference)       |                |
| AFLD&MAFLD                  | 1.48(1.02-2.15)   | 0.038          | 1.27(0.867-1.873)   | 0.218          |
| Chronic hepatic failure     |                   |                |                     |                |
| AFLD                        | 1 (Reference)     |                | 1 (Reference)       |                |
| AFLD&MAFLD                  | 3.25(0.97-10.93)  | 0.057          | 2.34(0.65-8.38)     | 0.191          |

Adjusted for age, sex, race, comorbidities, smoking habit, and other organ failures correspondingly.

Abbreviation: AFLD, alcoholic fatty liver disease; AFLD&MAFLD, alcoholic fatty liver disease and metabolic-associated fatty liver disease (dual-etiology fatty liver disease); OR, odds ratio.
